# Supplementary material for: A New Panel-Based Next-Generation Sequencing Method for ADME Genes Reveals Novel Associations of Common and Rare Variants With Expression in a Human Liver Cohort
Source: Front Genet. 2019 Jan 31;10:7. doi: 10.3389/fgene.2019.00007 (PMC6365429; doi:10.3389/fgene.2019.00007)
Supplement: Supplementary file 3 [file Table_3.XLSX]

## Sheet: Supplement Table 3
Supplement Table 3: Novel variants observed in very important pharmacogenes (n=36)
PharmGKP.org VIP gene	novel var (n=502)	upstream	5'UTR	coding	inframe	INIT	MIS	SYN	splice	stop	intron	3'UTR
ABCB1	13						6	2	2		2
ABCG2	9		3				2	1			2	1
ADH1A	4	1					2				1
ADH1B	3		1								1	1
ADH1C	3			1			1	1
AHR	19	5	5				3	1			1	4
ALDH1A1	5						2	1	1		1
CFTR	15	1					5	1	1		3	4
COMT	25		5		2		5	2			2	9
CYP1A2	26	5					1	4	1		3	12
CYP2A6	14	5					4	1	2		2
CYP2B6	23	6					2		1		3	11
CYP2C8	10	7					2	1
CYP2C9	3	1					1		1
CYP2C19	0
CYP2D6	40	24					7	1	3		4	1
CYP2E1	9						5	2		1	1
CYP2J2	3							3
CYP3A4	7		1				2				2	2
CYP3A5	8		1				2		1		4
CYP4F2	15		1				6	1	1		6
DPYD	23	14	1				5	1			2
GSTP1	14		1				7	2			3	1
GSTT1	14		2				4	3	1		2	2
KCNJ11	21		10									11
NAT2	1	1
NR1I2	20	5					8	1	1		3	2
SLC19A1	8						6	1			1
SLC22A1	26		1				12	6	1		6
SLCO1B1	8	1					3	3		1
SULT1A1	12		4				3	1	1		2	1
TPMT	33	25					2				2	4
TYMS	12		1				3				5	3
UGT1A1	4						2				2
VDR	42		2				6	6	2		8	17
VKORC1	10		3			1	1	1			3
